# Supplementary material for: A Special Additive Enables All Cations and Anions Passivation for Stable Perovskite Solar Cells with Efficiency over 23%
Source: PubMed Central journal article supplement (PMC8346611; doi:10.1007/s40820-021-00688-2), 2021-08-06
Supplement: 40820_2021_688_MOESM1_ESM.pdf [file 40820_2021_688_MOESM1_ESM.pdf]

Supporting Information for

## A Special Additive Enables All Cations and Anions Passivation for Stable Perovskite Solar Cells with Efficiency over 23%

Wenjing Zhao<sup>1</sup>, Jie Xu<sup>1</sup>, Kun He<sup>1</sup>, Yuan Cai<sup>1</sup>, Yu Han<sup>1</sup>, Shaomin Yang<sup>1</sup>, Sheng Zhan<sup>1</sup>, Dapeng Wang<sup>1</sup>, Zhike Liu<sup>1, \*</sup>, and Shengzhong (Frank) Liu<sup>1, 2, \*</sup>

<sup>1</sup>Key Laboratory of Applied Surface and Colloid Chemistry, Ministry of Education; Shaanxi Key Laboratory for Advanced Energy Devices; Shaanxi Engineering Lab for Advanced Energy Technology; School of Materials Science & Engineering, Shaanxi Normal University, Xi'an, 710119, P. R. China

<sup>2</sup>Dalian National Laboratory for Clean Energy; iChEM, Dalian Institute of Chemical Physics, Chinese Academy of Sciences, Dalian, 116023, P. R. China.

\*Corresponding authors. E-mail: [zhike2015@snnu.edu.cn](mailto:zhike2015@snnu.edu.cn) (Zhike Liu); [szliu@dicp.ac.cn](mailto:szliu@dicp.ac.cn) (Shengzhong (Frank) Liu)

### Supplementary Figures and Tables

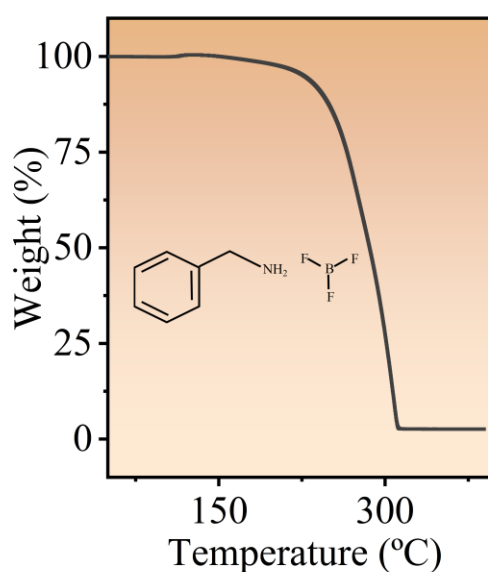

**Fig. S1** Thermogravimetric profile for BBF

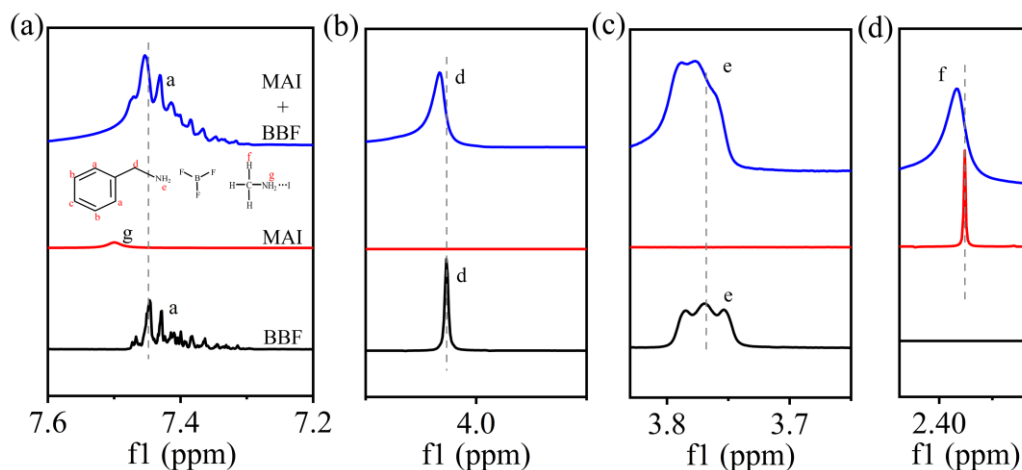

**Fig. S2**  $^1\text{H}$  NMR spectra of BBF, MAI, MAI+BBF

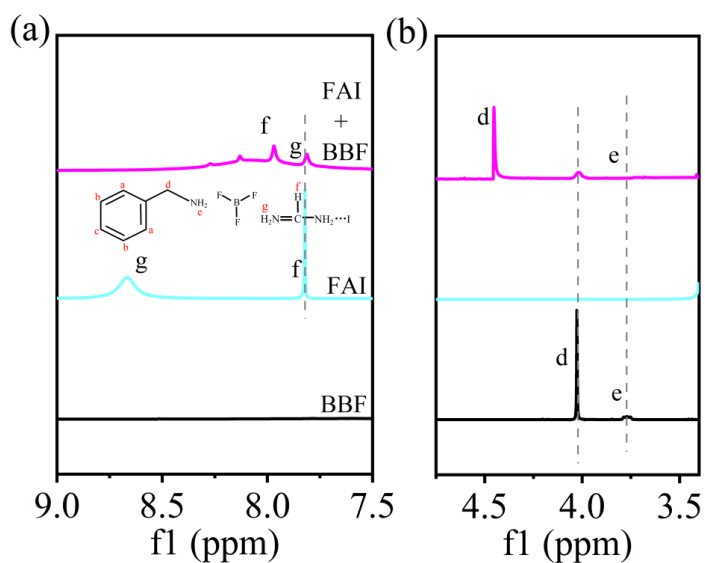

**Fig. S3**  $^1\text{H}$  NMR spectra of BBF, FAI, FAI+BBF

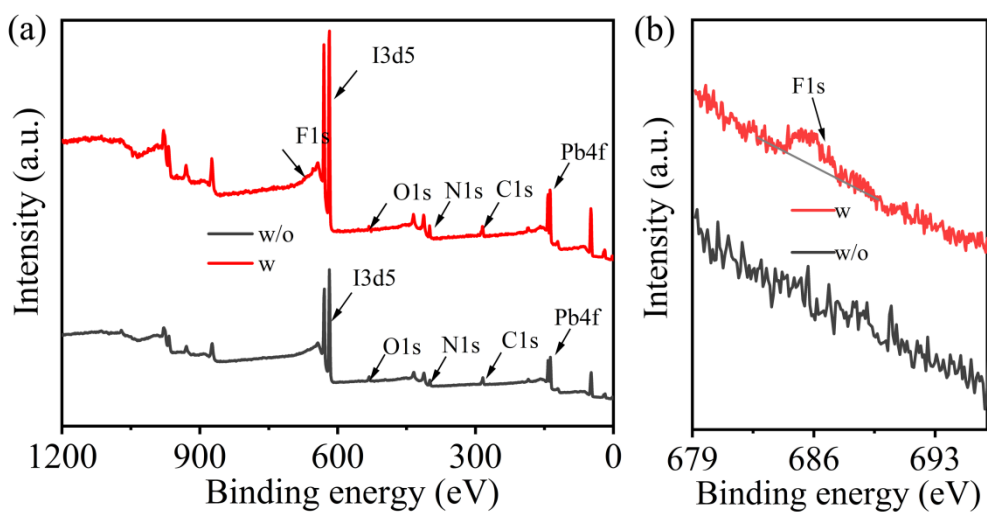

**Fig. S4** **a** Full XPS spectra and **b** F 1s of the perovskite film without and with BBF additive

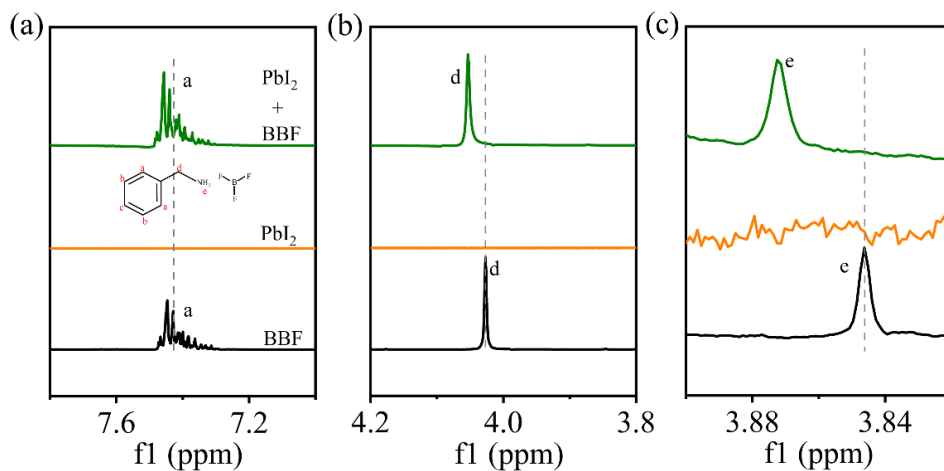

Fig. S5 <sup>1</sup>H NMR spectra of BBF, PbI<sub>2</sub>, PbI<sub>2</sub>+BBF

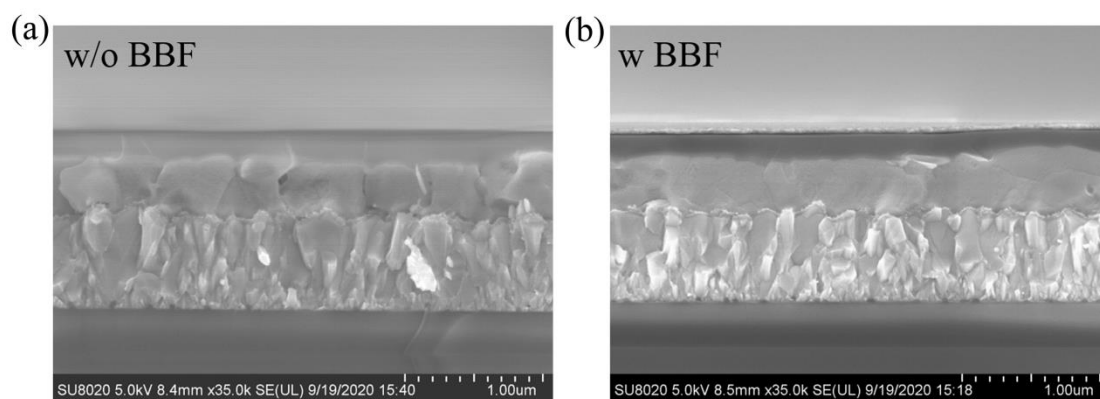

Fig. S6 Cross-sectional SEM images of the PSCs without and with BBF additive

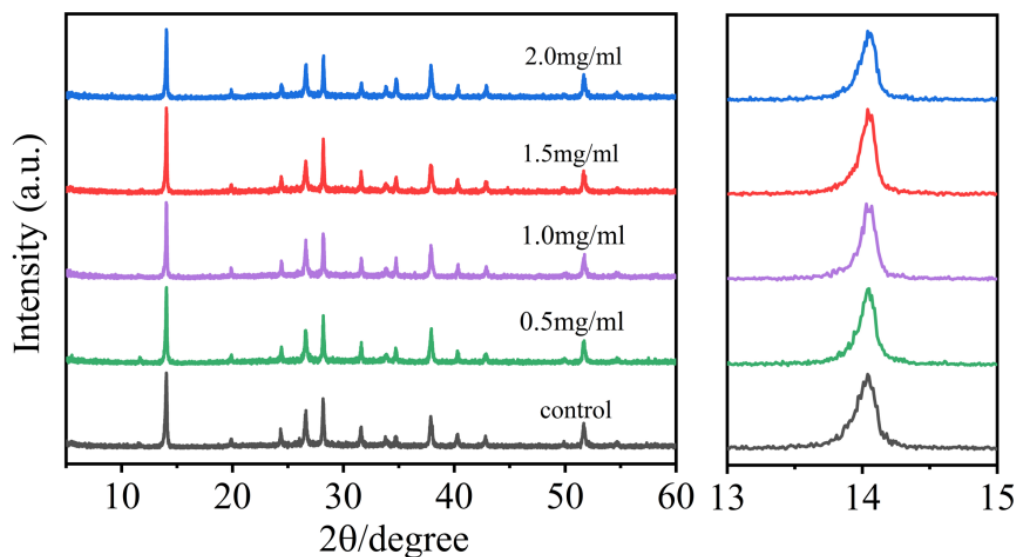

Fig. S7 XRD pattern and (110) diffraction peaks of the perovskite films with different concentrations of BBF additives

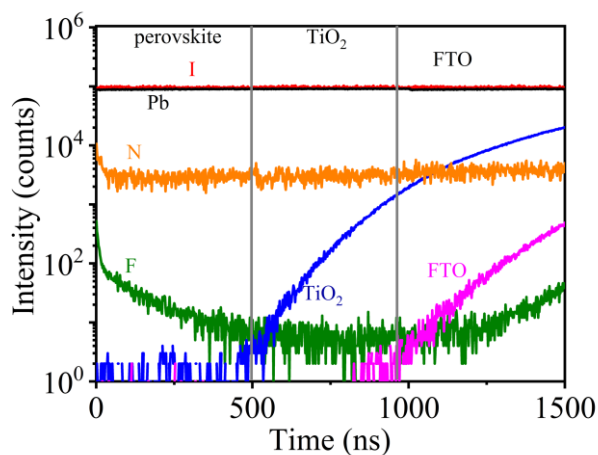

**Fig. S8** ToF-SIMS depth profile of the BBF-perovskite film

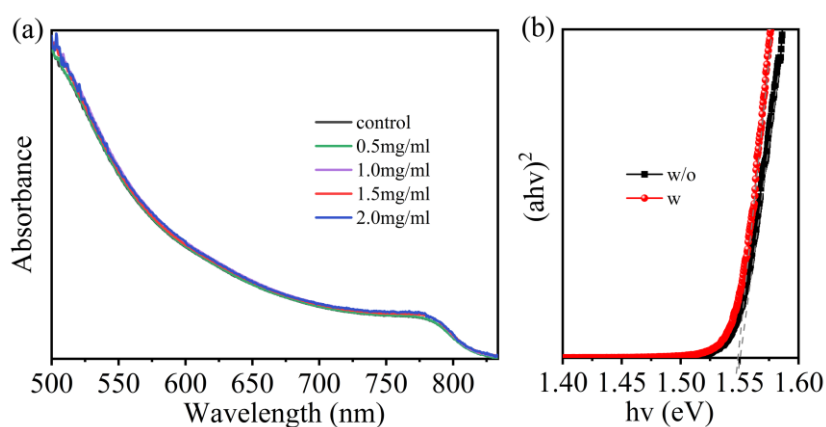

**Fig. S9 a** UV-Vis absorption spectra and **b** Tauc plots of the perovskite films without and with 1.5 mg/ml BBF additive

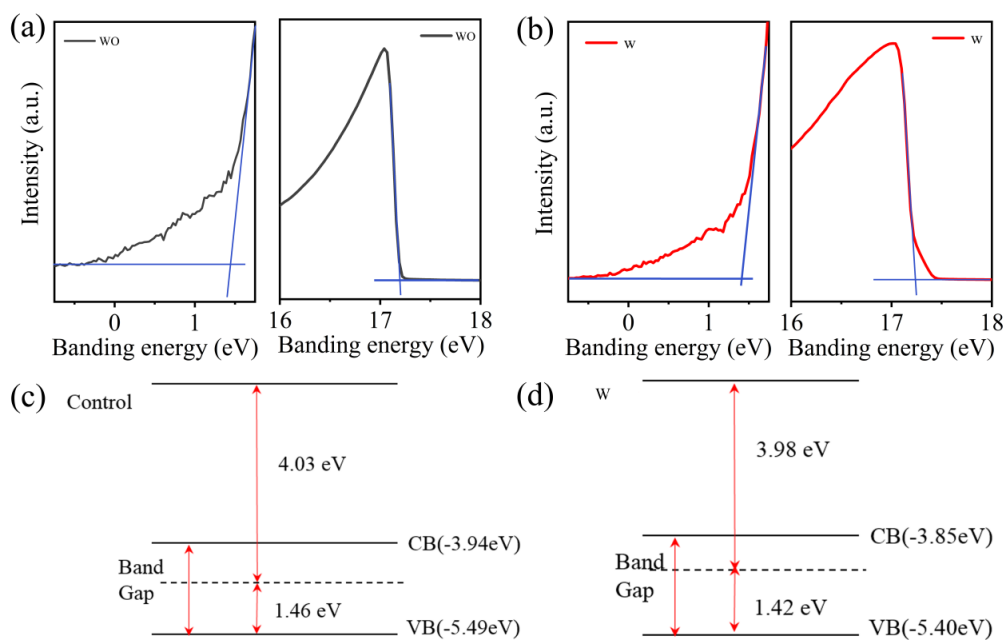

**Fig. S10 a, b** Valence band edges and cutoff regions of UPS spectra and **c, d** energy level diagrams for the perovskite films without and with BBF additive

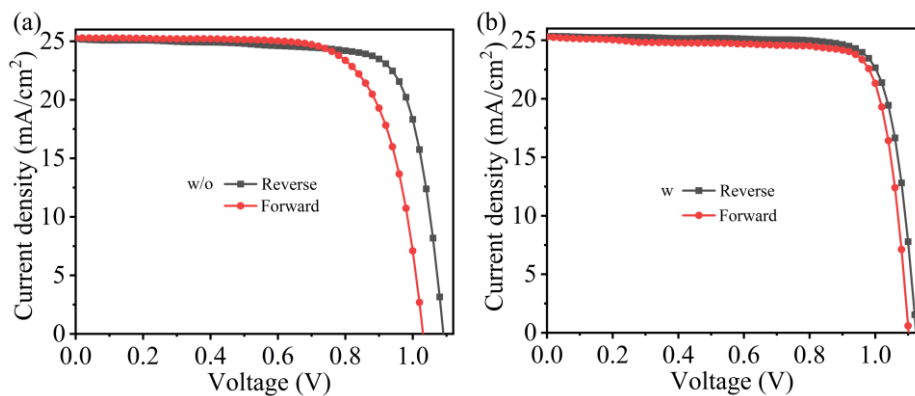

**Fig. S11** Reverse and forward  $J$ - $V$  curves of the PSCs **a** without and **b** with BBF additive

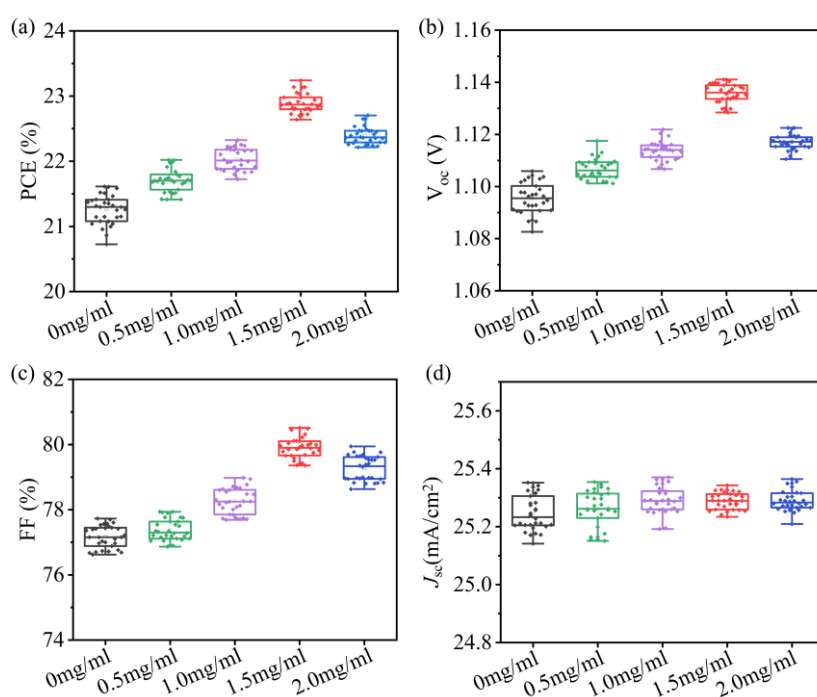

**Fig. S12** Box charts of **a** PCE, **b**  $V_{oc}$ , **c** FF and **d**  $J_{sc}$  of the PSCs (30 samples) with different concentrations of BBF additives

**Table S1** Fitting parameters of the TRPL spectra for perovskite films with different concentrations of BBF additives

| BBF (mg/mL) | $\tau_{ave}$ (ns) | $\tau_1$ (ns) | $A_1$ (%) | $\tau_2$ (ns) | $A_2$ (%) |
|-------------|-------------------|---------------|-----------|---------------|-----------|
| 0           | 242.63            | 248.25        | 96.98     | 62.42         | 3.02      |
| 0.5         | 401.33            | 464.05        | 78.04     | 178.83        | 21.96     |
| 1.0         | 521.72            | 569.74        | 89.32     | 120.76        | 10.68     |
| 1.5         | 676.66            | 794.73        | 82.16     | 132.34        | 17.84     |
| 2.0         | 634.75            | 712.16        | 84.91     | 199.71        | 15.09     |

**Table S2** Fitting parameters of the TRPL spectra for Glass/perovskite/Spiro-OMeTAD devices with different concentrations of BBF additives

| BBF (mg/ml) | $\tau_{ave}$ (ns) | $\tau_1$ (ns) | $A_1$ (%) | $\tau_2$ (ns) | $A_2$ (%) |
|-------------|-------------------|---------------|-----------|---------------|-----------|
| 0           | 184.61            | 325.02        | 52.85     | 27.21         | 47.15     |
| 0.5         | 179.47            | 305.51        | 54.28     | 29.83         | 45.72     |
| 1.0         | 163.84            | 309.61        | 49.61     | 20.19         | 50.39     |
| 1.5         | 97.15             | 148.92        | 43.81     | 5.68          | 56.19     |
| 2.0         | 142.32            | 248.96        | 50.80     | 32.2          | 49.20     |

**Table S3** Photovoltaic parameters of the PSCs without and with 1.5mg/mL BBF additive scan in different directions

| Device | Direction | $V_{OC}$ (V) | $J_{SC}$ (mA/cm <sup>2</sup> ) | FF   | PCE (%) | Hysteresis Index (%) |
|--------|-----------|--------------|--------------------------------|------|---------|----------------------|
| w/o    | Reverse   | 1.09         | 25.21                          | 0.77 | 21.21   | 12.1                 |
|        | Forward   | 1.03         | 25.20                          | 0.72 | 18.65   |                      |
| w      | Reverse   | 1.12         | 25.32                          | 0.81 | 22.97   | 2.4                  |
|        | Forward   | 1.10         | 25.26                          | 0.81 | 22.41   |                      |

**Table S4** EIS fitting parameters for the PSCs without and with BBF additive

| Device | $R_s$ ( $\Omega$ ) | $R_{tr}$ (k $\Omega$ ) | $R_{rec}$ (k $\Omega$ ) | $C_{rec}$ (F)         | $C_{tr}$ (F)          | $\tau_{rec}$ ( $\mu$ s) |
|--------|--------------------|------------------------|-------------------------|-----------------------|-----------------------|-------------------------|
| w/o    | 50.43              | 0.58                   | 5.10                    | $3.38 \times 10^{-8}$ | $1.21 \times 10^{-8}$ | 17.24                   |
| w      | 36.45              | 0.36                   | 16.16                   | $7.53 \times 10^{-8}$ | $9.75 \times 10^{-9}$ | 121.62                  |
